# Supplementary material for: De novo cholesterol biosynthesis in bacteria
Source: Springer Nature journal article supplement (doi:10.1038/s41467-023-38638-8), 2023-05-22
Supplement: MOESM1 [file 41467_2023_38638_MOESM1_ESM.pdf]

## **Supporting Information for:**

### **De novo cholesterol biosynthesis in bacteria**

Alysha K. Lee<sup>1</sup>, Jeremy H. Wei<sup>1</sup>, and Paula V. Welander<sup>1\*</sup>

<sup>1</sup>Department of Earth System Science, Stanford University, Stanford, CA 94305, USA

\*Corresponding author: [welander@stanford.edu](mailto:welander@stanford.edu)

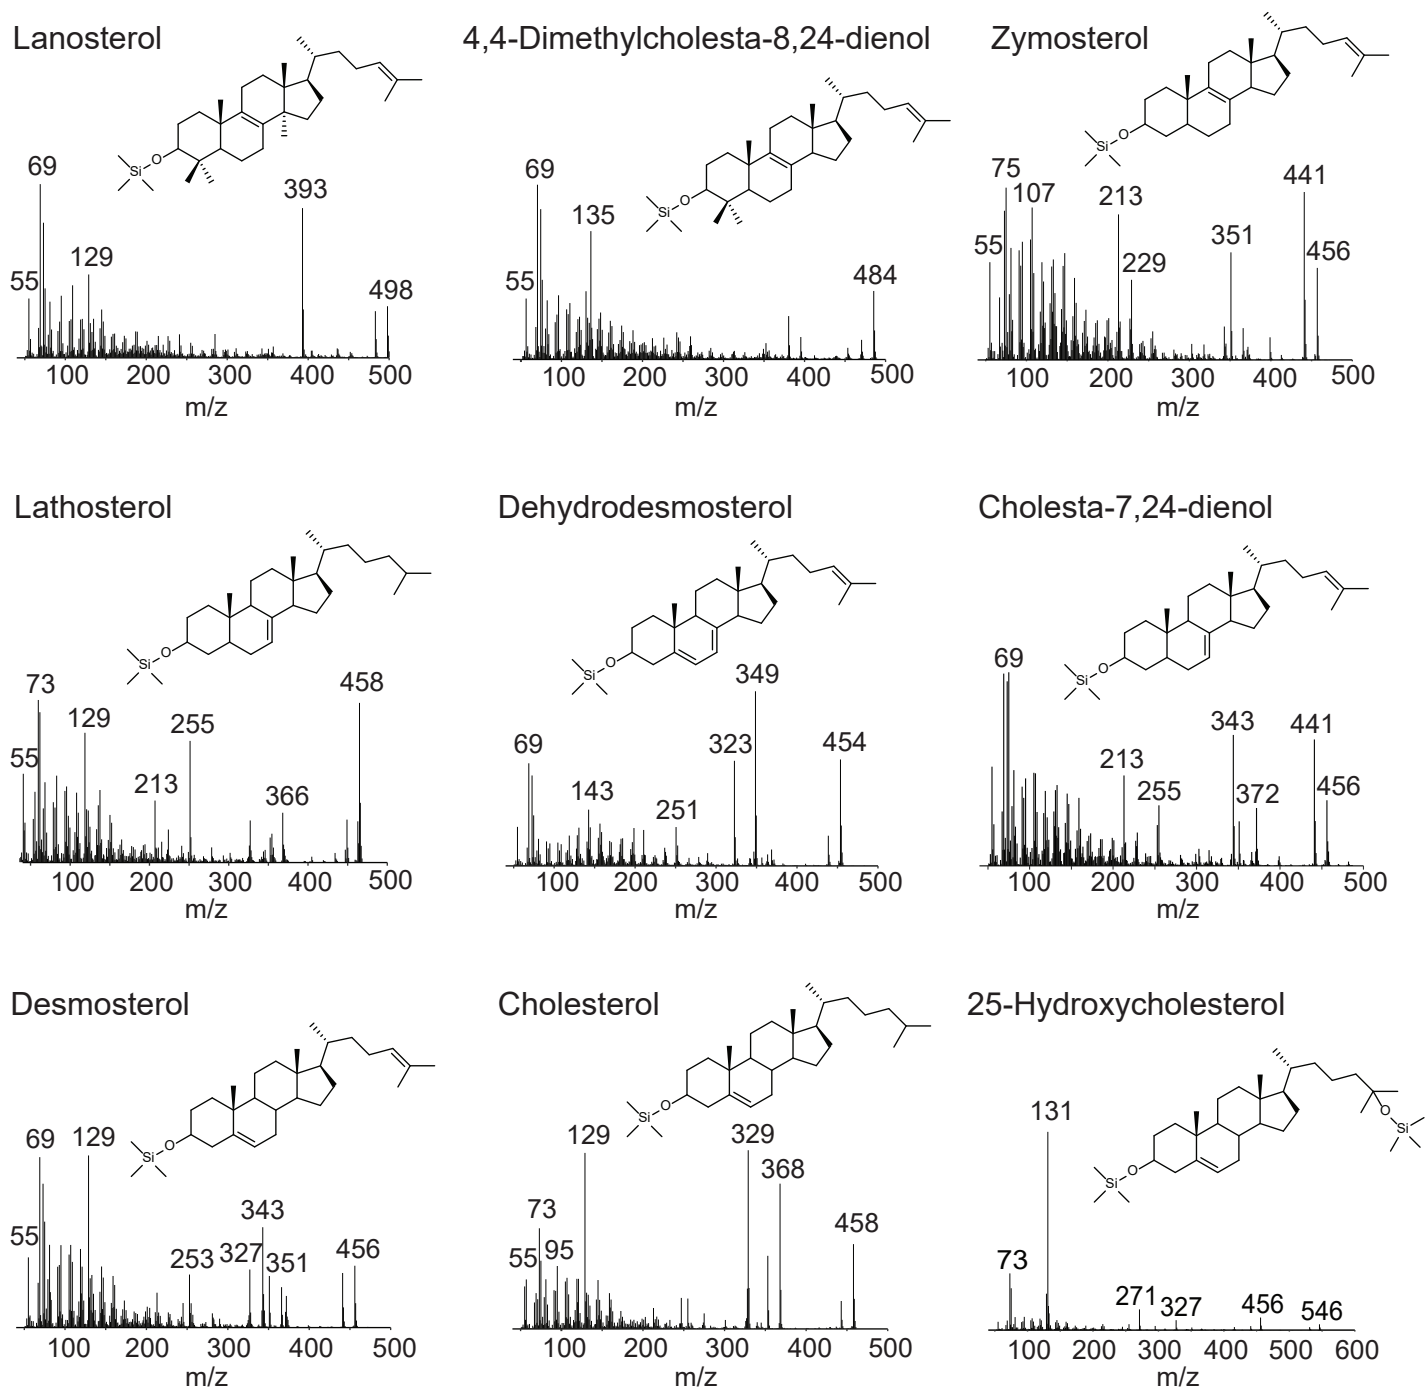

**Supplementary Figure 1.** Mass spectra of sterols identified in *E. salina* or *Calothrix* NIES-4105 extracts. Extracted sterols were derivatized to trimethylsilyl (TMS) groups and separated on an Agilent 7890B series GC through a 60m Agilent DB17 column (60m x 0.25 mm i.d x 0.1  $\mu$ m film thickness) with helium as the carrier gas coupled to a 5977A series MS. See Methods for full GC-MS method details.

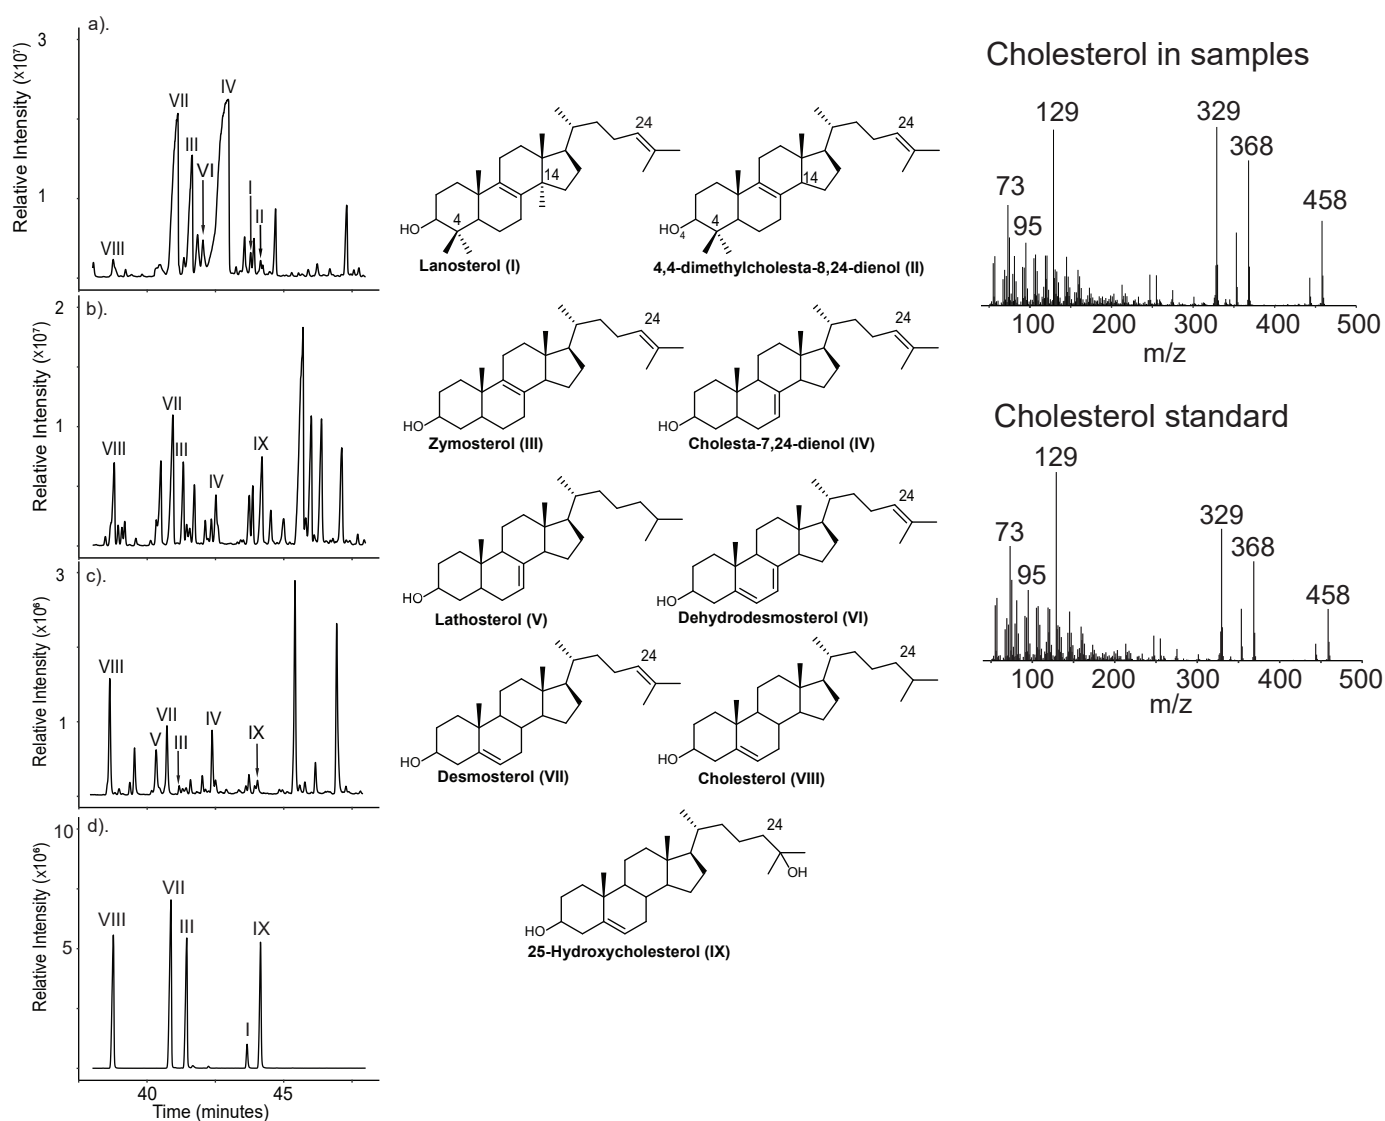

**Supplementary Figure 2.** Sterol chromatograms compared to a sterol standard mix. Total ion chromatograms from a). *E. salina* Bligh Dyer and b). acid hydrolysis extractions, c). *Calothrix* acid hydrolysis extraction, and d). a sterol standard mix (lanosterol, zymosterol, desmosterol, cholesterol, and 25-hydroxycholesterol). Mass spectra for the cholesterol standard and the cholesterol found in bacterial extracts are provided for comparison.



**Supplementary Table 1.** Sterol concentrations for *E. salina* extractions. Quantification

methods are described in detail in methods section. Not detected ND. Below quantification limit (BQL).

|                                  | Biomass<br>extracted<br>(mg dry<br>weight) | Total lipids<br>extracted(mg) | Cholesterol<br>(ng/mg dry<br>weight) | Desmosterol<br>(ng/mg dry<br>weight) | Zymosterol<br>(ng/mg dry<br>weight) | 25-OHC<br>(ng/mg<br>dry<br>weight) |
|----------------------------------|--------------------------------------------|-------------------------------|--------------------------------------|--------------------------------------|-------------------------------------|------------------------------------|
| <b>Bligh Dyer<br/>Extraction</b> |                                            |                               |                                      |                                      |                                     |                                    |
| <i>E.salina</i><br>culture 1     | 17.30                                      | 1.24                          | 108.38                               | 224.51                               | 36.13                               | ND                                 |
| <i>E.salina</i><br>culture 2     | 19.43                                      | 1.07                          | 70.77                                | 223.70                               | 36.99                               | ND                                 |
| <i>E.salina</i><br>culture 3     | 16.23                                      | 1.43                          | 73.40                                | 348.06                               | 69.13                               | ND                                 |
| <b>Acid<br/>Hydrolysis</b>       |                                            |                               |                                      |                                      |                                     |                                    |
| <i>E. salina</i>                 | 73.0                                       | 2.8                           | 65.75                                | 87.32                                | BQL                                 | 85.56                              |

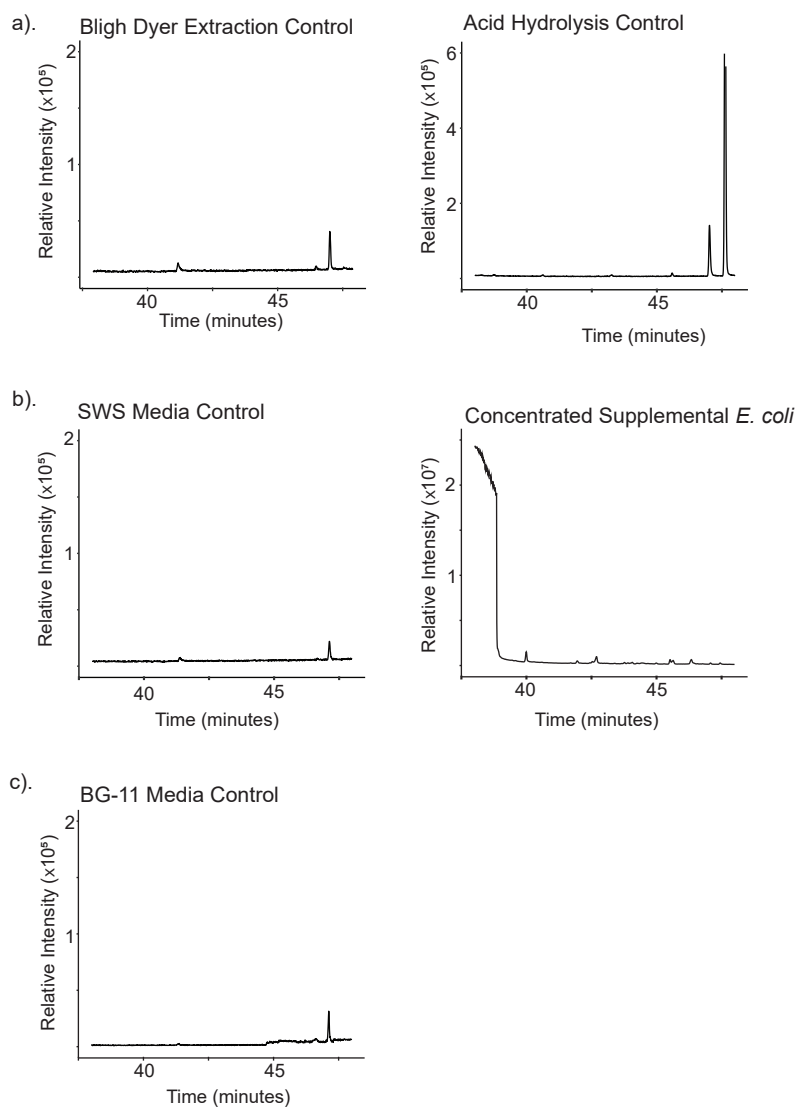

**Supplementary Figure 4.** Total ion chromatograms of extraction controls and growth media.

Total ion chromatogram of total lipid extracts (TLE) from a). extraction processes used to analyze sterols in *E. salina* and *Calothrix*. Sterile water was added in place of bacterial biomass.

b). Extractions of media components used to culture *E. salina*. Both medium and supplemental *E. coli* were extracted using a modified Bligh Dyer technique. Extracted *E. coli* was concentrated 5-fold from what was used to culture *E. salina*. c). Extraction of medium used to culture *Calothrix*. Medium was extracted using a modified Bligh Dyer technique. Spectra in peaks of all chromatograms were compared to the NIST database and published spectra and none were found to be sterols.

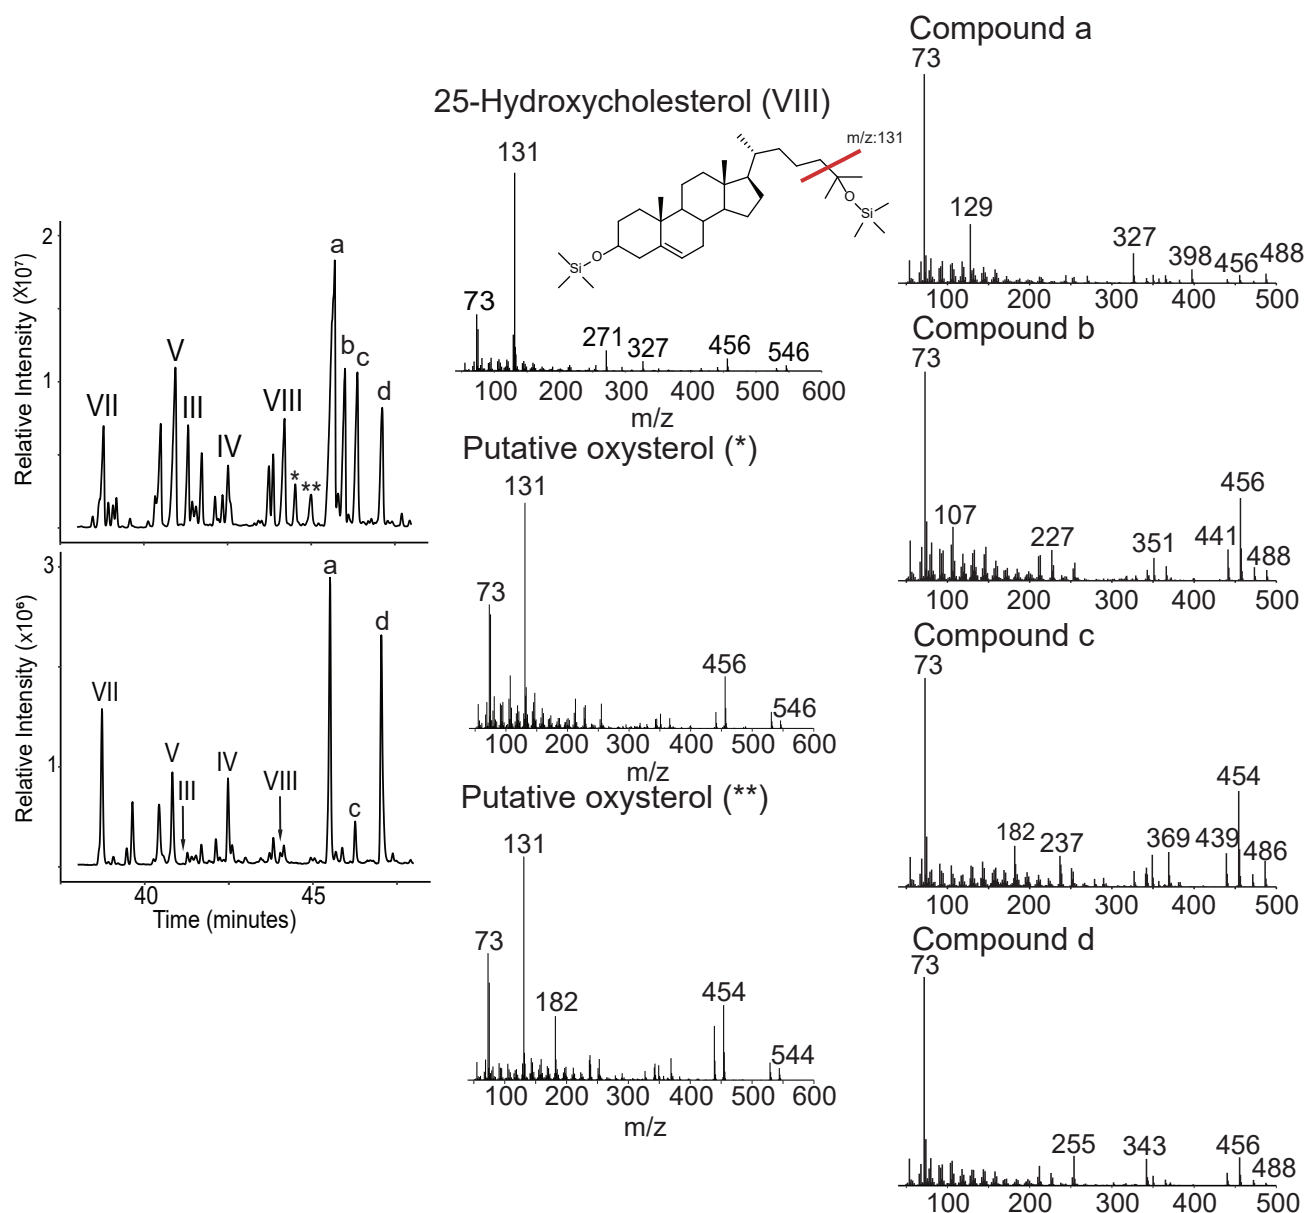

**Supplementary Figure 5.** Hydroxysterols released from hydrolyzed *E. salina* lipid extracts.

TMS-derivatized 25-hydroxycholesterol (25-OCH) has a diagnostic 131 peak that is produced from fragmentation of the side chain. The presence of 25-OCH in *E. salina* samples was confirmed by comparing elution time to a known standard. Two neighboring peaks were found to share the same parent ion and diagnostic 131 peak, suggesting they may also represent sterols hydroxylated at C-25. Additionally, significant relative abundance elute after the 45 minute mark. The prominent 73 peak, also seen in cholesterol diethers, and the parent ion leads us to speculate these may be sterol monoethers, however further characterization is needed to identify these compounds.

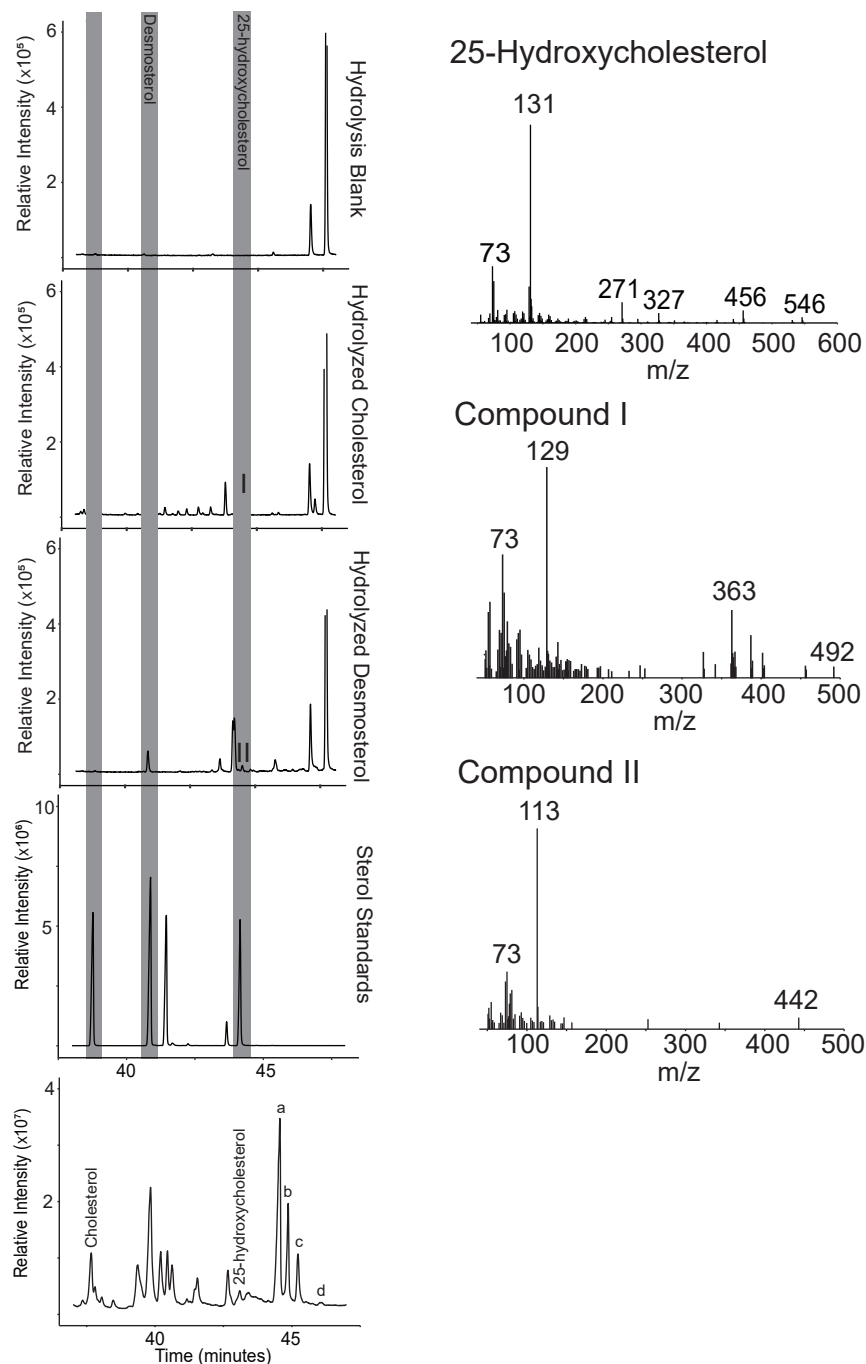

**Supplementary Figure 6.** Autooxidation controls for acid hydrolysis of sterols. Total ion chromatograms of a hydrolysis blank, a hydrolyzed cholesterol standard, a hydrolyzed desmosterol standard, and *E. salina* biomass hydrolyzed with butylated hydroxytoluene (BHT). Acid hydrolysis was performed as described in the Methods section. Lipids were derivatized to TMS groups. The spectra of peaks observed in the hydrolyzed standard chromatograms were compared to a 25-hydroxycholesterol standard and spectra deposited in the NIST database and were not found to be oxysterols. Additionally, hydrolysis of *E. salina* biomass in the presence of BHT still resulted in release of 25-hydroxycholesterol and other additional peaks observed in hydrolysis reactions without BHT.



**Supplementary Table 2** *E. salina* and *Calothrix* sp. NIES-4105 closest homologs to canonical sterol biosynthesis genes. Sterol biosynthesis genes from *Homo sapiens*, *Saccharomyces cerevisiae*, and *Methylococcus capsulatus* were used as a query for BLASTp search (e-value <  $1 \times 10^{-10}$ ) to identify putative cholesterol biosynthesis pathways in *E. salina* and *Calothrix*. Putative sterol biosynthesis genes in each organism were then used as a query for BLASTp search in the other bacterium. IMG database locus tags for top hits in each bacterium, with corresponding e-values and identities, are listed for each gene in the canonical cholesterol biosynthesis pathway. E-values colored green and bolded within our e-value cutoff (e-value <  $1 \times 10^{-30}$ ). E-values colored yellow and marked with an asterisk denote homologs where lowest e-value hit in either *Calothrix* or *E. salina* was not the putative sterol biosynthesis gene identified through previous BLASTp searches. N/A denotes organisms without listed sterol biosynthesis gene. --- denotes no homolog found with set e-value cutoffs.

|                                              | <i>H. sapiens</i>                  | <i>S. cerevisiae</i>              | <i>M. capsulatus</i>               | <i>E. salina</i> | <i>Calothrix</i><br>sp. NIES-4105  |
|----------------------------------------------|------------------------------------|-----------------------------------|------------------------------------|------------------|------------------------------------|
| <b><i>E. salina</i></b>                      |                                    |                                   |                                    |                  |                                    |
| Squalene monooxygenase<br>(Ga0097779_102654) | $1e^{-27}/25\%$                    | $2e^{-28}/24\%$                   | <b><math>2e^{-37}/29\%</math></b>  | N/A              | <b><math>3e^{-40}/31\%</math></b>  |
| Oxidosqualene cyclase<br>(Ga0097779_114516)  | <b><math>6e^{-112}/33\%</math></b> | <b><math>3e^{-96}/30\%</math></b> | <b><math>1e^{-169}/44\%</math></b> | N/A              | <b><math>8e^{-155}/38\%</math></b> |
| C-14 demethylase<br>(Ga0097779_103211)       | <b><math>4e^{-97}/36\%</math></b>  | <b><math>7e^{-86}/34\%</math></b> | <b><math>8e^{-133}/44\%</math></b> | N/A              | <b><math>1e^{-154}/48\%</math></b> |
| C-14 reductase<br>(Ga0097779_105926)         | <b><math>1e^{-42}/32\%</math></b>  | <b><math>2e^{-41}/29\%</math></b> | N/A                                | N/A              | <b><math>5e^{-44}/63\%</math></b>  |
| SdmA<br>(Ga0097779_103152)                   | N/A                                | N/A                               | <b><math>3e^{-104}/45\%</math></b> | N/A              | <b><math>1e^{-163}/60\%</math></b> |
| SdmB<br>(Ga0097779_103151)                   | N/A                                | N/A                               | <b><math>2e^{-79}/41\%</math></b>  | N/A              | <b><math>1e^{-121}/50\%</math></b> |
| ERG25<br>(Ga0097779_103191)                  | $2e^{-08}/24\%$                    | $2e^{-15}/26\%$                   | N/A                                | N/A              | $5e^{-27}/30\%$                    |
| ERG26<br>(Ga0097779_105318)                  | <b><math>2e^{-46}/32\%</math></b>  | <b><math>1e^{-39}/32\%</math></b> | N/A                                | N/A              | <b><math>3e^{-44}/31\%</math></b>  |
| ERG27<br>(Ga0097779_11785)                   | $8e^{-12}/26\%$                    | ---                               | N/A                                | N/A              | $4e^{-11}/27\%^*$                  |
| C-8 sterol isomerase<br>(Ga0097779_103215)   | <b><math>2e^{-37}/39\%</math></b>  | <b><math>8e^{-47}/43\%</math></b> | N/A                                | N/A              | <b><math>2e^{-57}/51\%</math></b>  |

|                                                         |                         |                         |                         |                         |                         |
|---------------------------------------------------------|-------------------------|-------------------------|-------------------------|-------------------------|-------------------------|
| C-5 desaturase<br>(Ga0097779_11078)                     | 1e <sup>-45</sup> /35%  | 1e <sup>-41</sup> /36%  | N/A                     | N/A                     | 4e <sup>-16</sup> /30%* |
| 7-dehydrocholesterol<br>reductase<br>(Ga0097779_100662) | 1e <sup>-87</sup> /36%  | ---                     | N/A                     | N/A                     | 2e <sup>-16</sup> /30%* |
| Delta 24 sterol reductase<br>(Ga0097779_101115)         | 2e <sup>-127</sup> /41% | ---                     | 2e <sup>-94</sup> /38%  | N/A                     | ---                     |
| <b>Calothrix sp. NIES-4105</b>                          |                         |                         |                         |                         |                         |
| Squalene monooxygenase<br>(Ga0263810_115391)            | 3e <sup>-27</sup> /25%  | 1e <sup>-28</sup> /27%  | 3e <sup>-32</sup> /26%  | 2e <sup>-40</sup> /31%  | N/A                     |
| Oxidosqualene cyclase<br>(Ga0263810_115390)             | 2e <sup>-163</sup> /39% | 3e <sup>-105</sup> /32% | 0.0/44%                 | 9e <sup>-155</sup> /38% | N/A                     |
| C-14 demethylase<br>(Ga0263810_115381)                  | 4e <sup>-111</sup> /38% | 1e <sup>-78</sup> /33%  | e <sup>-131</sup> /44%  | 2e <sup>-158</sup> /48% | N/A                     |
| C-14 reductase<br>(Ga0263810_115392)                    | 2e <sup>-22</sup> /40%  | 2e <sup>-15</sup> /36%  | N/A                     | 2e <sup>-42</sup> /63%  | N/A                     |
| SdmA<br>(Ga0263810_115380)                              | N/A                     | N/A                     | 1e <sup>-102</sup> /44% | 1e <sup>-163</sup> /60% | N/A                     |
| SdmB<br>(Ga0263810_115382)                              | N/A                     | N/A                     | 7e <sup>-97</sup> /45%  | 1e <sup>-121</sup> /50% | N/A                     |
| ERG25<br>(Ga0263810_118348)                             | 3e <sup>-15</sup> /32%  | 3e <sup>-18</sup> /35%  | N/A                     | 1e <sup>-28</sup> /30%* | N/A                     |
| ERG26<br>(Ga0263810_118461)                             | 7e <sup>-41</sup> /31%  | 8e <sup>-33</sup> /30%  | N/A                     | 3e <sup>-44</sup> /31%* | N/A                     |
| ERG27<br>(Ga0263810_119321)                             | 2e <sup>-16</sup> /25%  |                         | N/A                     | 2e <sup>-13</sup> /27%  | N/A                     |
| C-8 sterol isomerase<br>(Ga0263810_115389)              | 3e <sup>-31</sup> /35%  | 5e <sup>-27</sup> /36%  | N/A                     | 2e <sup>-57</sup> /49%  | N/A                     |
| C-5 desaturase<br>(Ga0263810_118508)                    | 3e <sup>-23</sup> /36%  | 4e <sup>-08</sup> /25%  | N/A                     | 1e <sup>-21</sup> /29%  | N/A                     |
| 7-dehydrocholesterol<br>reductase<br>(Ga0263810_115392) | 2e <sup>-16</sup> /31%  | ---                     | N/A                     | 6e <sup>-14</sup> /30%  | N/A                     |
| Delta 24 sterol reductase<br>(Ga0263810_116277)         | 2e <sup>-10</sup> /34%  | ----                    | 8e <sup>-11</sup> /31%  | 6e <sup>-04</sup> /25%  | N/A                     |

### Squalene Monooxygenase

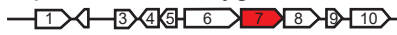

- |                         |                                  |
|-------------------------|----------------------------------|
| 1: Cytochrome P450      | 6: SHC-like cyclase              |
| 2: Hypothetical protein | <b>7: Squalene monooxygenase</b> |
| 3: Hypothetical protein | 8: DUF4388                       |
| 4: Hypothetical protein | 9: Hypothetical protein          |
| 5: Hypothetical protein | 10: Transposase DDE domain       |

### Oxidosqualene Cyclase

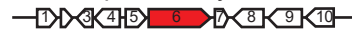

- |                                  |                                 |
|----------------------------------|---------------------------------|
| 1: Hypothetical protein          | <b>6: Oxidosqualene cyclase</b> |
| 2: Hypothetical protein          | 7: Hypothetical protein         |
| 3: Acyl-CoA thioester hydrolyase | 8: Hypothetical protein         |
| 4: Hypothetical protein          | 9: Pur regulated permease       |
| 5: Methyltransferase             | 10: Hypothetical protein        |

### C-14 Demethylase and C-8 Isomerase

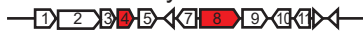

- |                                  |                             |
|----------------------------------|-----------------------------|
| 1: Hypothetical protein          | 7: Hypothetical protein     |
| 2: GH3 auxin responsive promoter | <b>8: C-14 demethylase</b>  |
| 3: AcrR-type regulator           | 9: Patatin-like phosphatase |
| <b>4: C-8 isomerase</b>          | 10: Phage integrase family  |
| 5: Archaeometzincin              | 11: XRE-type regulator      |
| 6: Hypothetical protein          | 12: HTH domian protein      |

### C-14 Reductase

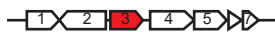

- |                          |                                            |
|--------------------------|--------------------------------------------|
| 1: Hypothetical protein  | 5: Hypothetical protein                    |
| 2: Hypothetical protein  | 6: Hypothetical protein                    |
| <b>3: C-14 reductase</b> | 7: NLI interacting factor like phosphatase |
| 4: Hypothetical protein  |                                            |

### Sterol Demethylase A and Sterol Demethylase B

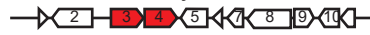

- |                                           |                                                   |
|-------------------------------------------|---------------------------------------------------|
| 1: Hypothetical protein                   | 7: RNA polymerase sigma-70 factor                 |
| 2: CotH protein                           | 8: Sigma-54 interaction domain                    |
| <b>3: SdmB</b>                            | 9: Hypothetical protein                           |
| <b>4: SdmA</b>                            | 10: Anti-ECF sigma factor, ChrR                   |
| 5: SSU ribosomal S6P Modification protein | 11: RNA polymerase sigma-70 factor, ECF subfamily |
| 6: Hypothetical protein                   |                                                   |

### Sterol Demethylase C

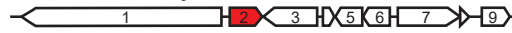

- |                            |                                    |
|----------------------------|------------------------------------|
| 1: Serine threonine kinase | 6: Hypothetical protein            |
| <b>2: SdmC</b>             | 7: GTP-binding protein             |
| 3: Hypothetical protein    | 8: YndJ-like protein               |
| 4: Hypothetical protein    | 9: Acetoin utilization deacetylase |
| 5: Hypothetical protein    |                                    |

### 7-Dehydrocholesterol Reductase

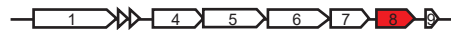

- |                            |                                          |
|----------------------------|------------------------------------------|
| 1: Serine threonine kinase | 5: Beat propeller domain protein         |
| 2: Hypothetical protein    | 6: Acylamino peptidase                   |
| 3: Hypothetical protein    | 7: Hypothetical protein                  |
| 4: Hypothetical protein    | <b>8: 7-dehydrocholesterol reductase</b> |
|                            | 9: Hypothetical protein                  |

### C-5 Desaturase

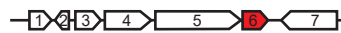

- |                         |                          |
|-------------------------|--------------------------|
| 1: Hypothetical protein | 5: Protein kinase        |
| 2: Hypothetical protein | <b>6: C-5 desaturase</b> |
| 3: Hypothetical protein | 7: Hypothetical protein  |
| 4: LDL receptor         |                          |

### C-24 Reductase

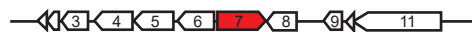

- |                              |                                     |
|------------------------------|-------------------------------------|
| 1: Hypothetical protein      | <b>7: Delta 24-sterol reductase</b> |
| 2: Hypothetical protein      | 8: Hypothetical protein             |
| 3: Small conductance channel | 9: Rotamase                         |
| 4: GAF domain protein        | 10: RNA polymerase sigma subunit    |
| 5: NtrC-type regulator       | 11: Hypothetical protein            |
| 6: Radical SAM               | 12: Serine threonine kinase         |

## Supplementary Figure 7. Genomic neighborhoods of sterol biosynthesis genes in *E. salina*.

Sterol biosynthesis genes identified by our BLASTp search ( $<1 \times 10^{-30}$ ; 30% ID) are colored red and text labels bolded.

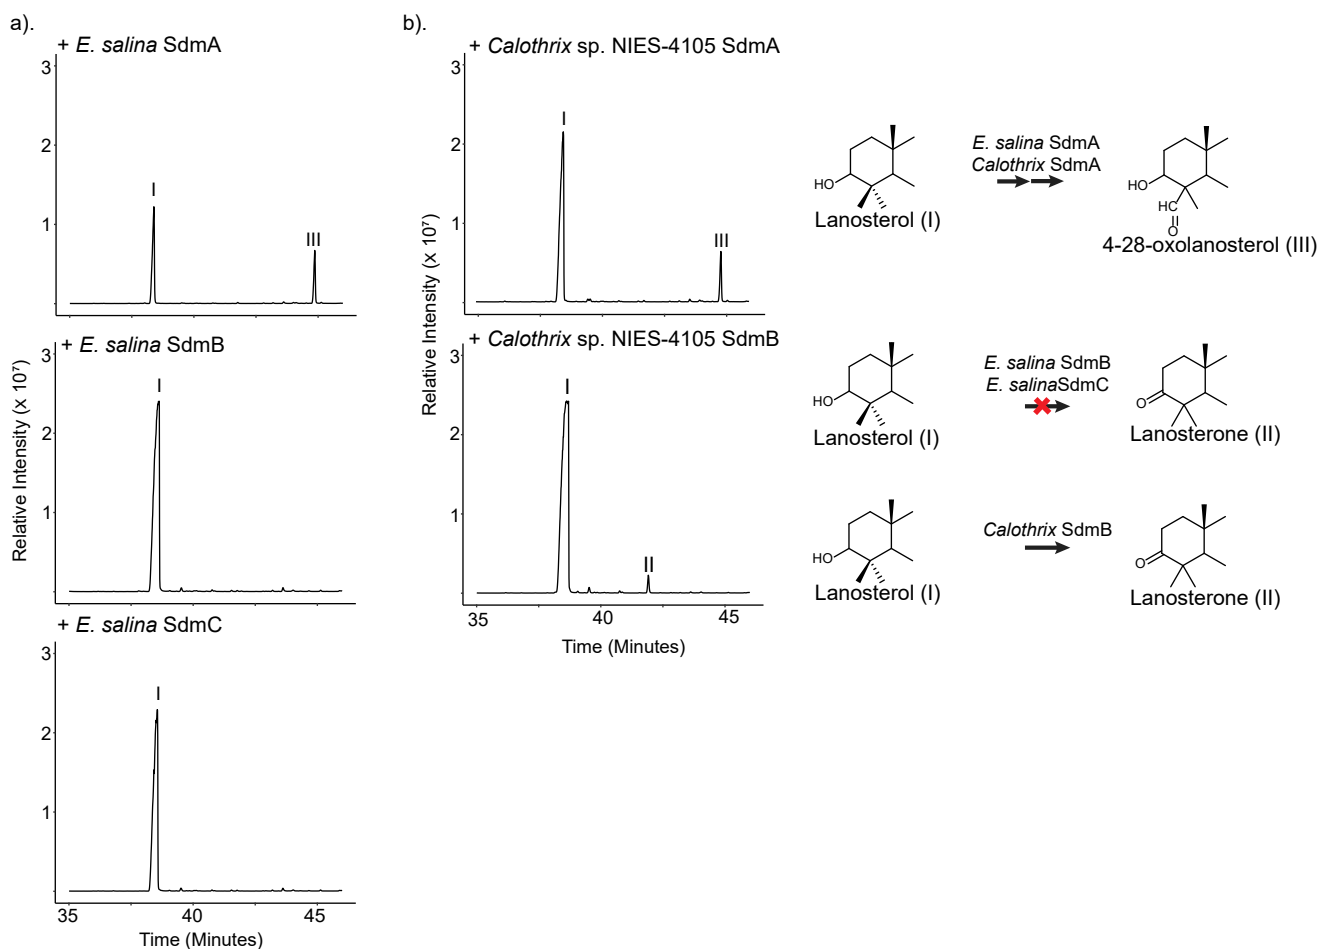

**Supplementary Figure 8.** Total ion chromatograms of TLEs of a). heterologous expression strains from *E. salina* SdmA, SdmB, and SdmC homologs and b). heterologous expression strains from *Calothrix* SdmA and SdmB homologs. In both organisms, SdmA homologs produce the C-4 oxidation intermediate, 4-28-oxolanosterol. The SdmB and SdmC homologs from *E. salina* have no apparent effect on the substrate lanosterol. The SdmB homolog from *Calothrix* oxidizes the 3 $\beta$ -hydroxyl into a ketone, producing lanosterone.

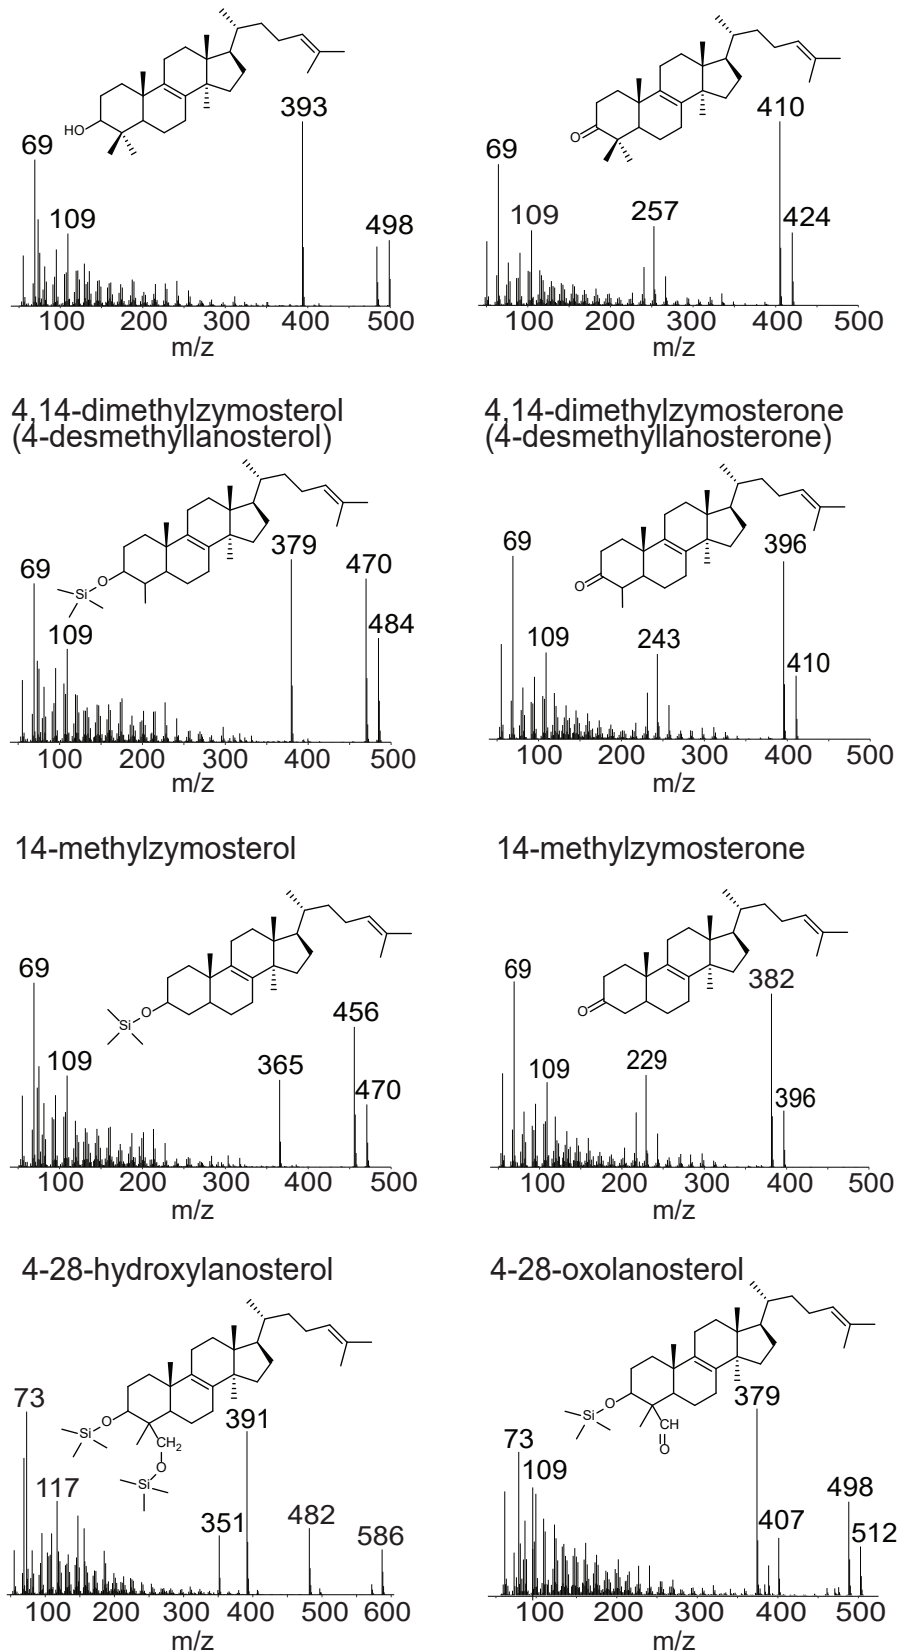

**Supplementary Figure 9.** Mass spectra of sterols identified in heterologous expression cultures. Extracted sterols were derivatized to TMS groups and separated on an Agilent 7890B series GC with helium as the carrier gas and was coupled to a 5977A series MS. See Methods section for full GC-MS method details.



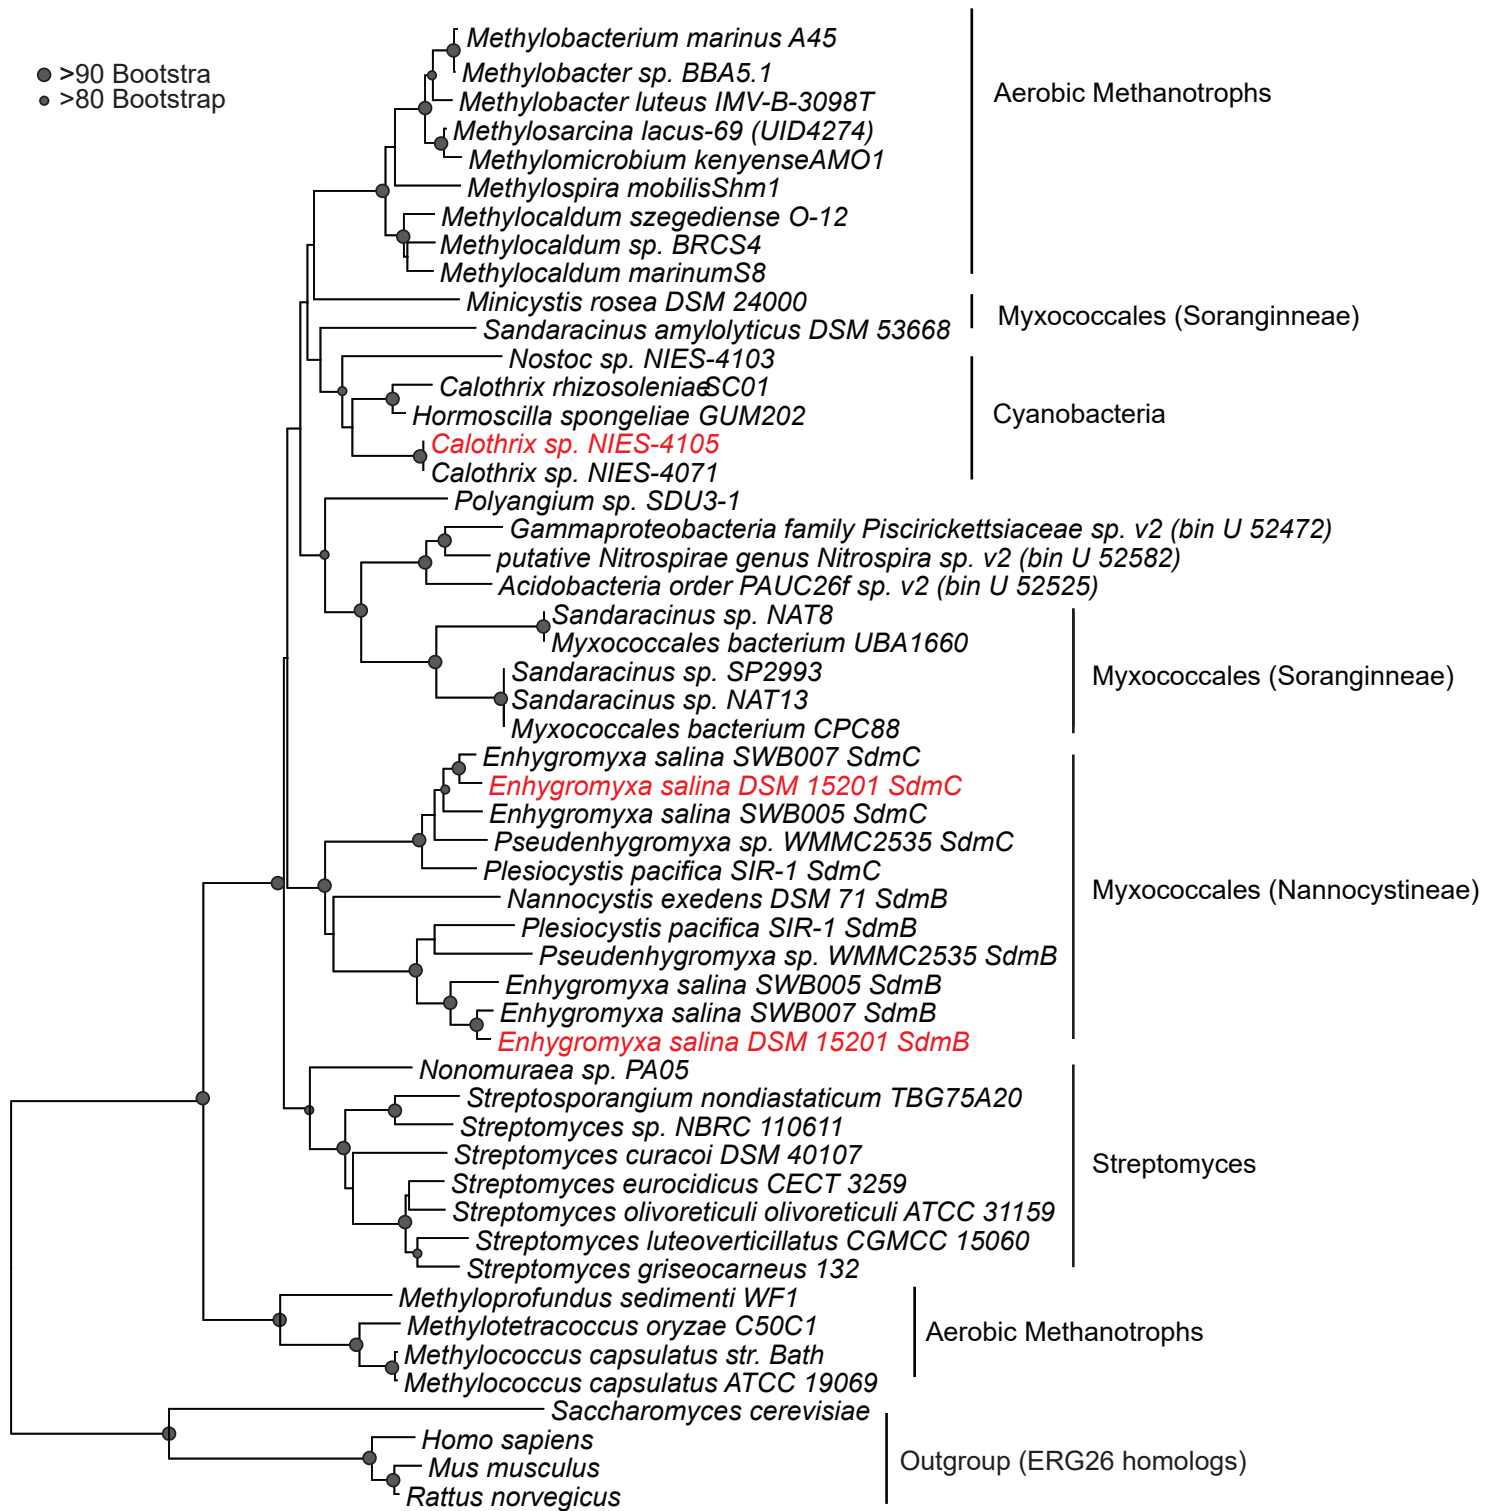

**Supplementary Figure 11.** Neighbor-joining phylogenetic tree of SdmBC homologs. Homologs were identified by BLASTp search (e-value  $<1 \times 10^{-50}$ ; 30% identity) of the JGI genomic databases. Protein sequences were aligned by MUSCLE using MEGA. A neighbor-joining tree was generated using the gamma model, four gamma rate categories and 500 bootstrap replicates. SdmB homologs from *E. salina* and *Calothrix* and the SdmC homolog from *E. salina* tested in this paper are highlighted red. SdmC homologs are only present in the Myxococcata suborder Nannocystineae and form a monophyletic clade with SdmB homologs from the same suborder.

a). C-4 demethylation in eukaryotes (fungi and vertebrates):

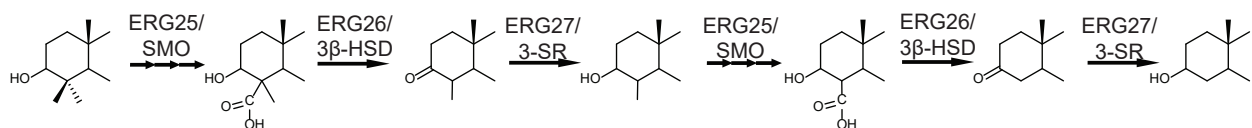

b). C-4 demethylation in aerobic methanotrophic bacteria:

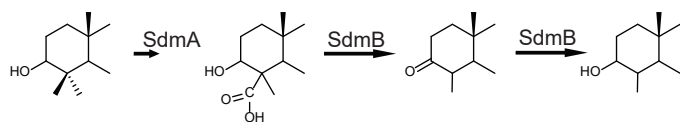

c). C-4 demethylation in *E. salina*:

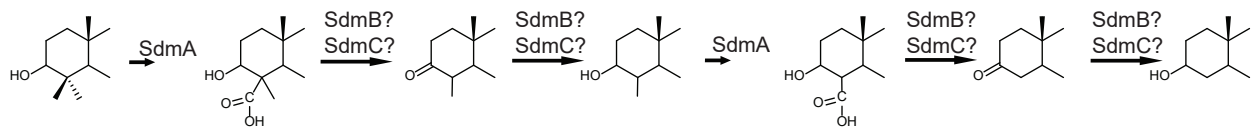

d). C-4 demethylation in *Calothrix*:

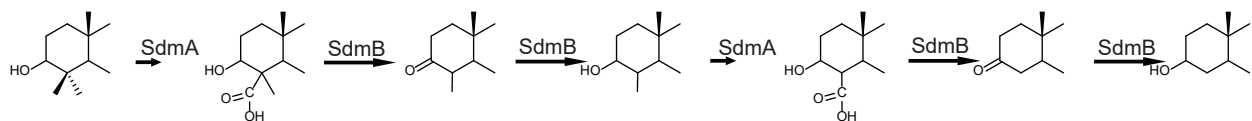

**Supplementary Figure 12.** C-4 demethylation in eukaryotes and bacteria. a). In eukaryotes, C4

demethylation is carried out by three enzymes. ERG25/SMO, a monooxygenase, performs three oxidation reactions to carboxylate the 4 $\alpha$ -methyl group. ERG26/3 $\beta$ -HSD, a short chain dehydrogenase reductase (SDR)-type reductase, catalyzes the decarboxylation of the 4 $\alpha$ -methyl group and remaining methyl group epimerizes into the  $\alpha$ -position. ERG27/3-SR, an SDR-type reductase, reduces the C-3 ketone to a hydroxyl. This concerted reaction repeats a second time to remove the remaining methyl group. b). In aerobic methanotrophs, SdmA, a dioxygenase, performs the required oxidation reactions to carboxylate the 4 $\beta$ -methyl group.

SdmB, an SDR-type reductase, then both decarboxylates the 4 $\beta$ -methyl group and reduces the C-3 ketone to a hydroxyl, producing the final monomethyl product. c). In *E. salina*, SdmA oxidizes one of the C-4 methyl groups to a carboxylate. SdmB and/or SdmC then perform the decarboxylation and reduction reactions. Further mechanistic study is required to untangle the role these two proteins have in C-4 demethylation. This reaction then repeats likely through the same mechanism. d). In *Calothrix*, SdmA oxidizes one of the methyl groups to a carboxylate. SdmB then performs the decarboxylation and reduction reactions to remove the first methyl group. This reaction then repeats, likely through the same mechanism.



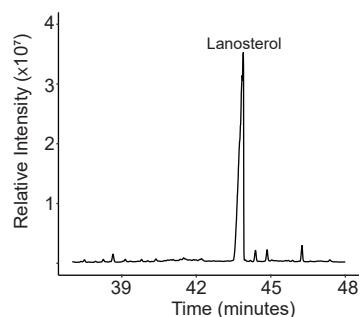

**Supplementary Figure 13.** Total ion chromatogram of TLE from heterologous expression of oxidosqualene cyclase (*osc*) from serial passaged *Calothrix* strain. *osc* was amplified from genomic DNA extracted from the serial passaged *Calothrix* strain, cloned into a compatible plasmid and expressed in an *E. coli* strain engineered to overproduce oxidosqualene. This resulted in production of lanosterol, demonstrating that when expressed *osc* from the serial passaged *Calothrix* strain is functional.

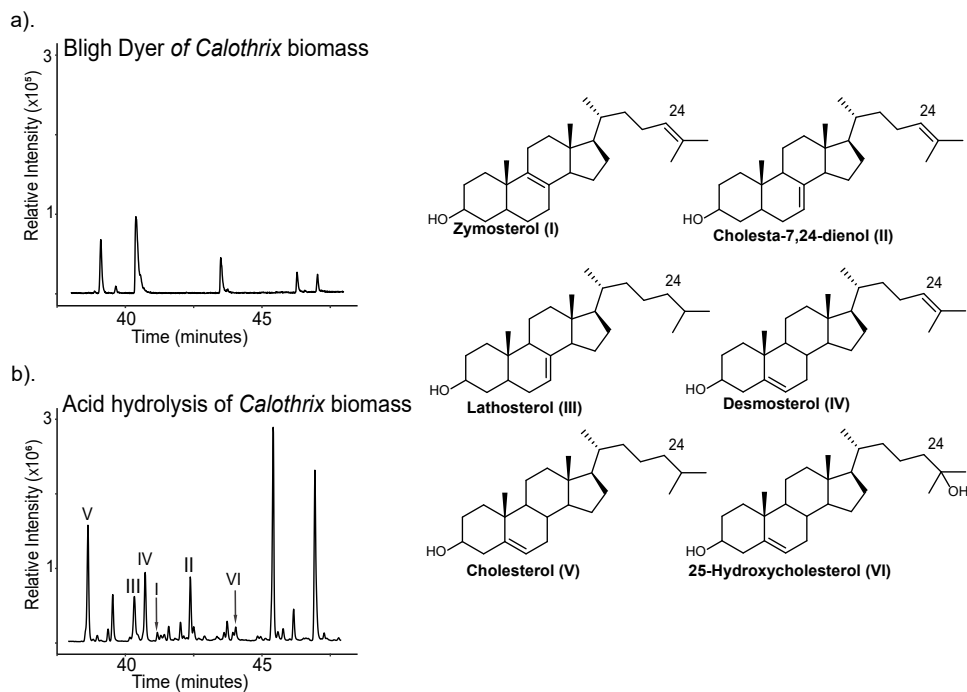

**Supplementary Figure 14.** Initial sterol analysis of *Calothrix* sp. NIES-4105. a). Total ion chromatograms of free lipids extracted from *Calothrix* using a modified Bligh Dyer procedure. Peaks present in this chromatogram were not sterols based on retention time and comparison to a sterol standard mix (lanosterol, zymosterol, desmosterol, cholesterol, and 25-hydroxycholesterol at 40 ng/ $\mu$ l). b). Total ion chromatogram of ether and ester bound lipids extracted from *Calothrix* biomass. Sterol identified included cholesterol (V) and both C-24 saturated (III) and unsaturated intermediates (I, II, and IV). Additionally, hydrolysis released 25-hydroxycholesterol (VI). All lipids were derivatized to TMS groups. Mass spectra of identified sterols are shown in Supplementary Figure 1.

**Supplementary Table 3.** Mutations present in serial passaged *Calothrix* sp. NIES-4105. RA indicates read alignment evidence for mutation. JC indicates new junction evidence for mutation. Mutation column describes specific mutation. In intergenic mutations, the distance from the start (+) or stop (-) of nearest genes are listed. In coding mutations, the location of mutation in gene as well as original nucleotide length is listed. IMG locus tags and annotation for each gene or nearest genes are listed.

| Evidence | Mutation             | Annotation                 | Gene                   | Description                                                                           |
|----------|----------------------|----------------------------|------------------------|---------------------------------------------------------------------------------------|
| RA       | Δ1 bp                | intergenic<br>(+33/-65)    | 118839 → /<br>→ 118838 | hypothetical protein/hypothetical protein                                             |
| RA       | (C) <sup>11→10</sup> | intergenic<br>(-194/+40)   | 114372← /<br>← 114371  | hypothetical protein/hypothetical protein                                             |
| RA       | C→G                  | intergenic<br>(-346/+392)  | 114310← /<br>← 114309  | 3-octaprenyl-4-hydroxybenzoate carboxy-lyase/3'-5' exoribonuclease, VacB and RNase II |
| RA       | 2 bp→GA              | intergenic<br>(-385/+352)  | 114310← /<br>← 114309  | 3-octaprenyl-4-hydroxybenzoate carboxy-lyase/3'-5' exoribonuclease, VacB and RNase II |
| RA       | +G                   | coding<br>(2515/2589 nt)   | 114218 ←               | TPR repeat-containing protein                                                         |
| RA       | 4 bp→AG AA           | coding (2511-2514/2589 nt) | 114218←                | TPR repeat-containing protein                                                         |
| RA       | G→C                  | L709L (CTC →CTG)           | 113884 ←               | TPR repeat-containing protein                                                         |
| JC       | +34 bp               | coding (2106/2169 nt)      | 113884 ←               | TPR repeat-containing protein                                                         |
| RA       | Δ1 bp                | coding (991/1116 nt)       | 113884 ←               | hypothetical protein                                                                  |
| JC       | 13 bp→130 bp         | coding (579591/951 nt)     | 113087←                | hypothetical protein                                                                  |
| RA       | T→G                  | intergenic<br>(+303/+143)  | 112194 → /<br>← 112193 | hypothetical protein/hypothetical protein                                             |
| RA       | T→C                  | intergenic<br>(+323/-312)  | 111735 → /<br>→ 111734 | 50S ribosomal protein L25/hypothetical protein                                        |

|    |     |                           |                        |                                                   |
|----|-----|---------------------------|------------------------|---------------------------------------------------|
| RA | T→G | intergenic<br>(+328/-307) | 111735 → /<br>→ 11734  | 50S ribosomal protein<br>L25/hypothetical protein |
| RA | A→T | intergenic<br>(-445/-271) | 119725 ← /<br>→ 119724 | hypothetical protein/hypothetical<br>protein      |

**Supplemental Table 4.** Bacterial strains used in this study.

| Strain                              | Genotype/Description                                                                                                                                                                                                                           | Source     |
|-------------------------------------|------------------------------------------------------------------------------------------------------------------------------------------------------------------------------------------------------------------------------------------------|------------|
| <i>Enhygromyxa salina</i> DSM 15201 | Wild type DSM 15201                                                                                                                                                                                                                            | DSMZ       |
| <i>Calothrix</i> sp. NIES-4105      | Wild type NIES-4105                                                                                                                                                                                                                            | NIES       |
| <i>Escherichia coli</i> DH10B       | Strain used for constructing plasmids, heterologous expression, and culturing <i>E. salina</i> .<br><br>F <sup>-</sup> endA1 recA1 galE15 galK16 nupG rpsL ΔlacX74<br>Φ80lacZΔM15 araD139 Δ(ara,leu)7697 mcrA Δ(mrr-hsdRMSmcrBC)λ <sup>-</sup> | Invitrogen |

**Supplemental Table 5.** Oligonucleotides used in this study. F indicates forward primer, R indicates reverse primer, seq indicates sequencing primer, MCAT indicates *Methylococcus capsulatus*, ESA indicates *Enhygromyxa salina*, and CALO indicates *Calothrix* sp. NIES\_4105.

| Oligonucleotide | Sequence                                             | Notes                                                    |
|-----------------|------------------------------------------------------|----------------------------------------------------------|
| AL1             | CAATTTACACAGGAGGCAAGCATATGAGC<br>CGATCGATCAGAAAC     | SLIC-pSRK-NdeI-MCAT <i>sdmA</i> F                        |
| AL2             | CGCGCTTGGCGTAATCATGGTCATCATGCC<br>GGGTCTGCC          | SLIC-pSRK-NdeI-MCAT <i>sdmA</i> R                        |
| AL3             | CAATTTACACAGGAGGCAAGCATATGACC<br>ACACTGGTCACCGGC     | SLIC-pSRK-NdeI-MCAT <i>sdmB</i> F                        |
| AL4             | GCGCTTGGCGTAATCATGGTCATCAGATCA<br>TCCCCCTCTCCCT      | SLIC-pSRK-NdeI-MCAT <i>sdmB</i> R                        |
| AL5             | AATGCAGCTGGCACGACAGG                                 | pSRK seq F                                               |
| AL7             | CCAGGGTTTTCCAGTCAC                                   | pSRK seq R                                               |
| AL22            | CCGCCAGGCAAATTCTGTTT                                 | pBAD seq R                                               |
| AL23            | CGTCACACTTTGCTATGCCA                                 | pBAD seq F                                               |
| AL34            | TTCTTTCCGAAGGCGTCGC                                  | ESA <i>sdmB</i> seq                                      |
| AL35            | TTGCCCCAAAAGGTGACCTCG                                | ESA <i>sdmA</i> seq                                      |
| AL99            | TTGGGCTAGCAGGAGGAATTCACATGTCTA<br>CCAAAGTTCGCATCCCC  | SLIC-pBAD-NcoI-ESA <i>sdmA</i> F                         |
| AL100           | GACTCTAGAGGATCCCCGGGTAC<br>TCACGACCCGCTGGGC          | SLIC-pBAD-NcoI-ESA <i>sdmA</i> R                         |
| AL95            | TTGGGCTAGCAGGAGGAATTCACATGAGTG<br>AAGCCGAACCCACAG    | SLIC-pBAD-NcoI-ESA <i>sdmB</i> F                         |
| AL96            | GACTCTAGAGGATCCCCGGGTACTTACTCG<br>GCGGCTTCGGT        | SLIC-pBAD-NcoI-ESA <i>sdmB</i> R                         |
| AL111           | CTGTGGGTTCGGCTTCACTCATTTACGACC<br>CGCTGGGCA          | SLIC-pBAD-NcoI-ESA <i>sdmA</i> -overlap w <i>sdmB</i> -R |
| AL112           | TGCCCAGCGGGTCGTAAATGAGTGAAGCCG<br>AACCCACAG          | SLIC-pBAD-NcoI-ESA <i>sdmB</i> -overlap w <i>sdmA</i> -F |
| AL142           | GCCCGGGGGATCCACTAGTTTCAGTGTCGG<br>CTCGAGAT           | SLIC-pBAD-XbaI-ESA <i>sdmC</i> R                         |
| AL143           | CCACCGCGGTGGCGGCCGCTATGGCTGAC<br>CCAGCGTAT           | SLIC-pBAD-XbaI-ESA <i>sdmC</i> F                         |
| AL161           | TTCGCGCGCTGTTTCAGCC                                  | ESA <i>sdmC</i> seq                                      |
| AL198           | TTGGGCTAGCAGGAGGAATTCACATGAAAG<br>ACATAGCTATAAAAGGCG | SLIC-pBAD-NcoI-CALO <i>sdmA</i> F                        |

|       |                                                        |                                       |
|-------|--------------------------------------------------------|---------------------------------------|
| AL199 | GACTCTAGAGGATCCCCGGGTACCTAGTTT<br>GGGGCGCTCG           | SLIC-pBAD-NcoI-<br>CALO <i>sdmB</i> R |
| AL200 | CTAAGTTTTCTGACTGTTGA                                   | CALO <i>sdmAB</i> Seq                 |
| AL258 | GACTCTAGAGGATCCCCGGGTACTCAACAG<br>TCAGAAAACCTTAGCCTCA  | SLIC-pBAD-NcoI-<br>CALO <i>sdmA</i> R |
| AL259 | AGCTCCCGTTACCAGAATTGTCATTCAACAG<br>TCAGAAAACCTTAGCCTCA | Overlap PCR CALO<br><i>sdmA</i> R     |
| AL260 | TTGGGCTAGCAGGAGGAATTCACATGACAA<br>TTCTGGTAACGGGAG      | SLIC-pBAD-NcoI-<br>CALO <i>sdmB</i> F |
| AL261 | GCTAAGTTTTCTGACTGTTGAATGACAATTC<br>TGGTAACGGGAG        | Overlap PCR CALO<br><i>sdmB</i> F     |
| AL264 | CAATTTACACAGGAGGCAAGCATATGTCT<br>GAACATTTAAACACCAAAC   | SLIC-pBAD-NcoI-<br>CALO <i>osc-F</i>  |
| AL265 | CGCGCTTGGCGTAATCATGGTCATCATCAA<br>ACCATTCGTTTCAACCG    | SLIC-pBAD-NcoI-<br>CALO <i>osc-R</i>  |

**Supplementary Table 6.** Plasmids used in this study. (\*) indicates this study, RBS indicates ribosome binding site, MCAT indicates *Methylococcus capsulatus*, ESA indicates *Enhygromyxa salina*, and CALO indicates *Calothrix* sp. NIES\_4105.

| Plasmid                                                            | Description                                                                                                                                                                                                                                       | Reference                                  |
|--------------------------------------------------------------------|---------------------------------------------------------------------------------------------------------------------------------------------------------------------------------------------------------------------------------------------------|--------------------------------------------|
| pTrc- <i>sqs</i> -synRBS- <i>osc</i> -synRBS- <i>smo</i> (pABB501) | MEALZ_3096-MEALZ_0768-MEALZ_0767 (Squalene synthase-Oxidosqualene cyclase-Squalene epoxidase) optimized expression plasmid (altered <i>osc</i> and <i>smo</i> RBSs).                                                                              | Lee et al, 2018 <sup>2</sup>               |
| pSRKGm-lacUV5-rbs5 (pABB492)                                       | pBBR1 ori, lacUV5 promoter, Gmr                                                                                                                                                                                                                   | Banta et al, 2017 <sup>3</sup>             |
| pBAD1031K (pABB466)                                                | pRV1031 ori, pBAD promoter, Kanr,                                                                                                                                                                                                                 | Chakravartty and Cronan, 2015 <sup>4</sup> |
| pSRK_MCAT_ <i>sdmA</i> (pAL7004)                                   | H156DRAFT_2756 ( <i>sdmA</i> ) expression plasmid<br><br>H156DRAFT_2756 was amplified by PCR with primers AL1 and AL2. The fragment was assembled by SLIC into the NdeI site of pABB492. Sequence was confirmed with oligos AL5 and AL7.          | (*)                                        |
| pSRK_MCAT_ <i>sdmB</i> (pAL7003)                                   | H156DRAFT_2755 ( <i>sdmB</i> ) expression plasmid<br><br>H156DRAFT_2755 was amplified by PCR with primers AL3 and AL4. The fragment was assembled by SLIC into the NdeI site of pABB492. Sequence was confirmed with oligos AL5 and AL7.          | (*)                                        |
| pBAD1031K_ESA_ <i>sdmA</i> (pAL7134)                               | Ga0097779_103152 ( <i>sdmA</i> ) expression plasmid<br><br>Ga0097779_103152 was amplified by PCR with primers AL99 and AL100. The fragment was assembled by SLIC into the NcoI site of pABB466. Sequence was confirmed with oligos AL22 and AL23. | (*)                                        |
| pBAD1031K_ESA_ <i>sdmB</i> (pAL7169)                               | Ga0097779_103151 ( <i>sdmB</i> ) expression plasmid                                                                                                                                                                                               |                                            |



|                                    |                                                                                                                                                                                                                                                                                                                                                                                                  |     |
|------------------------------------|--------------------------------------------------------------------------------------------------------------------------------------------------------------------------------------------------------------------------------------------------------------------------------------------------------------------------------------------------------------------------------------------------|-----|
|                                    | Ga0097779_103151 was amplified by PCR with primers AL95 and AL96. The fragment was assembled by SLIC into the NcoI site of pABB466. Sequence was confirmed with oligos AL22 and AL23.                                                                                                                                                                                                            | (*) |
| pBAD1031K_ESA_sdmC (pAL7180)       | Ga0097779_109097 ( <i>sdmC</i> ) expression plasmid<br><br>Ga0097779_103152 was amplified by PCR with primers AL142 and AL143. The fragment was assembled by SLIC into the XbaI site of pABB466. Sequence was confirmed with oligos AL22 and AL23.                                                                                                                                               | (*) |
| pBAD1031K_ESA_sdmAB (pAL7141)      | Ga0097779_103152 ( <i>sdmA</i> ) and Ga0097779_103151 ( <i>sdmB</i> ) co-expression plasmid<br><br>Ga0097779_103152 and Ga0097779_103151 were amplified by PCR with primers AL99, AL111 and AL96 and AL112, respectively. Fragments were annealed using overlap extension PCR and assembled by SLIC into the NcoI site of pABB466. Sequence was confirmed with oligos AL22, AL23, AL34 and AL35. | (*) |
| pBAD1031K_ESA_sdmAC (pAL7181)      | Ga0097779_103152 ( <i>sdmA</i> ) and Ga0097779_109097( <i>sdmC</i> ) co-expression plasmid<br><br>Ga0097779_109097 was amplified using oligos AL142 and AL143. The fragment was assembled by SLIC into the XbaI site of pAL7134. Sequence was confirmed with oligos AL22 and AL161.                                                                                                              | (*) |
| pBAD1031K_ESA_sdmAB-sdmC (pAL7170) | Ga0097779_103152 ( <i>sdmA</i> ), Ga0097779_103151 ( <i>sdmB</i> ), and Ga0097779_109097( <i>sdmC</i> ) co-expression plasmid<br><br>Ga0097779_109097 was amplified using oligos AL142 and AL143. The fragment was assembled by SLIC into the XbaI site of pAL7141. Sequence was confirmed with oligos AL22, AL23 and AL161.                                                                     | (*) |
| pBAD1031K_CALO_sdmA (pAL7298)      | Ga0263810_115380 ( <i>sdmA</i> ) expression plasmid                                                                                                                                                                                                                                                                                                                                              |     |

|                                        |                                                                                                                                                                                                                                                                                                                                                                                               |     |
|----------------------------------------|-----------------------------------------------------------------------------------------------------------------------------------------------------------------------------------------------------------------------------------------------------------------------------------------------------------------------------------------------------------------------------------------------|-----|
|                                        | Ga0263810_115380 was amplified by PCR with primers AL198 and AL258. The fragment was assembled by SLIC into the NcoI site of pABB466. Sequence was confirmed with oligos AL22 and AL23.                                                                                                                                                                                                       | (*) |
| pBAD1031K_CALO_ <i>sdmB</i> (pAL7296)  | Ga0263810_115382 ( <i>sdmB</i> ) expression plasmid<br><br>Ga0263810_115382 was amplified by PCR with primers AL199 and AL260. The fragment was assembled by SLIC into the NcoI site of pABB466. Sequence was confirmed with oligos AL22 and AL23.                                                                                                                                            | (*) |
| pBAD1031K_CALO_ <i>sdmAB</i> (pAL7297) | Ga0263810_115380 ( <i>sdmA</i> ) and Ga0263810_115382 ( <i>sdmB</i> ) co-expression plasmid<br><br>Ga0263810_115380 and Ga0263810_115382 were amplified by PCR with primers AL198, AL259 and AL199 and AL261, respectively. Fragments were annealed using overlap extension PCR and assembled by SLIC into the NcoI site of pABB466. Sequence was confirmed with oligos AL22, AL23 and AL200. | (*) |
| pSRK_CALO_ <i>osc</i> (pAL7309)        | Ga0263810_115390 ( <i>osc</i> ) expression plasmid<br><br>Ga0263810_115390 was amplified by PCR with primers AL264 and AL265. The fragment was assembled by SLIC into the NdeI site of pABB492. Sequence was confirmed with oligos AL5 and AL7.                                                                                                                                               | (*) |

**Supplementary Table 7.** Heterologous expression strains used in this study. All expression strains are *E. coli* DH10B with pJBEI2997 (pABB302, CmR), pTrc (pABB278 or derivatives, AmpR), pSRK (pABB492 or derivatives, Gmr) (where indicated), and pBAD1031K (pABB466 or derivatives, KanR) (where indicated).

| Expression Strain | Plasmids                                                                                                                                                          |
|-------------------|-------------------------------------------------------------------------------------------------------------------------------------------------------------------|
| PVW 7011          | pJBEI2997 (pABB302), pTrc- <i>sqg</i> -synRBS- <i>osc</i> -synRBS- <i>smo</i> (pABB501), pSRKGm-lacUV5-rbs5 (pABB492), pBAD1031K (pABB466)                        |
| PVW 7130          | pJBEI2997 (pABB302), pTrc- <i>sqg</i> -synRBS- <i>osc</i> -synRBS- <i>smo</i> (pABB501), pBAD1031K_ESA_ <i>sdmA</i> (pAL7134), pSRK_MCAT_ <i>sdmB</i> (pAL7003)   |
| PVW 7131          | pJBEI2997 (pABB302), pTrc- <i>sqg</i> -synRBS- <i>osc</i> -synRBS- <i>smo</i> (pABB501), +pBAD ESA 1017 + pSRK_MCAT_ <i>sdmA</i> (pAL7004)                        |
| PVW 7305          | pJBEI2997 (pABB302), pTrc- <i>sqg</i> -synRBS- <i>osc</i> -synRBS- <i>smo</i> (pABB501), pSRKGm-lacUV5-rbs5 (pABB492), pBAD1031K_ESA_ <i>sdmA</i> (pAL7134)       |
| PVW 7119          | pJBEI2997 (pABB302), pTrc- <i>sqg</i> -synRBS- <i>osc</i> -synRBS- <i>smo</i> (pABB501), pSRKGm-lacUV5-rbs5 (pABB492), pBAD1031K_ESA_ <i>sdmB</i> (pAL7169)       |
| PVW 7228          | pJBEI2997 (pABB302), pTrc- <i>sqg</i> -synRBS- <i>osc</i> -synRBS- <i>smo</i> (pABB501), pSRKGm-lacUV5-rbs5 (pABB492), pBAD1031K_ESA_ <i>sdmC</i> (pAL7180)       |
| PVW 7143          | pJBEI2997 (pABB302), pTrc- <i>sqg</i> -synRBS- <i>osc</i> -synRBS- <i>smo</i> (pABB501), pSRKGm-lacUV5-rbs5 (pABB492), pBAD1031K_ESA_ <i>sdmAB</i> (pAL7141)      |
| PVW 7303          | pJBEI2997 (pABB302), pTrc- <i>sqg</i> -synRBS- <i>osc</i> -synRBS- <i>smo</i> (pABB501), pSRKGm-lacUV5-rbs5 (pABB492), pBAD1031K_ESA_ <i>sdmAC</i> (pAL7181)      |
| PVW 7304          | pJBEI2997 (pABB302), pTrc- <i>sqg</i> -synRBS- <i>osc</i> -synRBS- <i>smo</i> (pABB501), pSRKGm-lacUV5-rbs5 (pABB492), pBAD1031K_ESA_ <i>sdmAB-sdmC</i> (pAL7170) |
| PVW 7301          | pJBEI2997 (pABB302), pTrc- <i>sqg</i> -synRBS- <i>osc</i> -synRBS- <i>smo</i> (pABB501), pSRKGm-lacUV5-rbs5 (pABB492), pBAD1031K_CALO_ <i>sdmA</i> (pAL7298)      |
| PVW 7300          | pJBEI2997 (pABB302), pTrc- <i>sqg</i> -synRBS- <i>osc</i> -synRBS- <i>smo</i> (pABB501), pSRKGm-lacUV5-rbs5 (pABB492), pBAD1031K_CALO_ <i>sdmB</i> (pAL7296)      |
| PVW 7299          | pJBEI2997 (pABB302), pTrc- <i>sqg</i> -synRBS- <i>osc</i> -synRBS- <i>smo</i> (pABB501), pSRKGm-lacUV5-rbs5 (pABB492), pBAD1031K_CALO_ <i>sdmAB</i> (pAL7297)     |
| PVW 7310          | pJBEI2997 (pABB302), pTrc- <i>sqg</i> -synRBS- <i>osc</i> -synRBS- <i>smo</i> (pABB501), pSRK_CALO_osc (pAL7309), pBAD1031K (ABB466)                              |

### Supplementary References:

1. Mitsche, M. A., McDonald, J. G., Hobbs, H. H. & Cohen, J. C. Flux analysis of cholesterol biosynthesis in vivo reveals multiple tissue and cell-type specific pathways. *eLife* **4**, e07999 (2015).
2. Lee, A. K. et al. C-4 sterol demethylation enzymes distinguish bacterial and eukaryotic sterol synthesis. *Proceedings of the National Academy of Sciences* **115**, 5884–5889 (2018).
3. Banta, A. B., Wei, J. H., Gill, C. C. C., Giner, J.-L. & Welander, P. V. Synthesis of arborane triterpenols by a bacterial oxidosqualene cyclase. *Proc Natl Acad Sci U S A* **114**, 245–250 (2017).
4. Chakravartty, V. & Cronan, J. E. A series of medium and high copy number arabinose-inducible *Escherichia coli* expression vectors compatible with pBR322 and pACYC184. *Plasmid* **81**, 21–26 (2015).
